# Supplementary material for: Transgenic Expression of the Dicotyledonous Pattern Recognition Receptor EFR in Rice Leads to Ligand-Dependent Activation of Defense Responses
Source: PubMed Central journal article supplement (PMC4379099; doi:10.1371/journal.ppat.1004809), 2015-03-30
Supplement: ppat.1004809.s008.pdf [file ppat.1004809.s008.pdf]

|                  |                                                     |     |
|------------------|-----------------------------------------------------|-----|
| <i>Xoo</i>       | MAKAKFERTKPHVNVGTIGHVDHGKTTLTAALTKIGAERFGGEFKAYDAI  | 50  |
| <i>A. avenae</i> | MAKAGKERTKPHVNVGTIGHVDHGKTTLTAAIATVLSAKFGGEAKKYDEI  | 50  |
| <i>E. coli</i>   | MSKEKFERTKPHVNVGTIGHVDHGKTTLTAAITTVLAKTYGGAARAFDQI  | 50  |
|                  | *:* *****:..: : :** : :* *                          |     |
| <i>Xoo</i>       | DAAPEEKARGITISTAHVEYESPSRHYAHVDCPGHADYVKNMITGAAQMD  | 100 |
| <i>A. avenae</i> | DAAPEEKARGITINTAHVEYETANRHYAHVDCPGHADYVKNMITGAAQMD  | 100 |
| <i>E. coli</i>   | DNAPPEEKARGITINTSHVEYDTPTRHYAHVDCPGHADYVKNMITGAAQMD | 100 |
|                  | * *****.*:****:..*****                              |     |
| <i>Xoo</i>       | GAILVCSAADGMPMPQTRHILLSRQVGVPPIVFLNKADMVDDAELLELV   | 150 |
| <i>A. avenae</i> | GAILVCSAADGMPMPQTRHILLARQVGVPYIIVFLNKCDMVDDEELLELV  | 150 |
| <i>E. coli</i>   | GAILVVAATDGMPMPQTRHILLGRQVGVPYIIVFLNKCDMVDDEELLELV  | 150 |
|                  | ***** :*:*****.******:*:*****.***** *****           |     |
| <i>Xoo</i>       | EMEVRELLSKYDFPGDDTPIIHGSARLALDGDQSEIGVPAILKLVDALDT  | 200 |
| <i>A. avenae</i> | EMEVRELLDKYDFPGDDTPIVRGSAKLALLEGDKGPLGEQAIDKLAEALDT | 200 |
| <i>E. coli</i>   | EMEVRELLSQYDFPGDDTPIVRGSAKALEGD--AEWEAKILELAGFLDS   | 198 |
|                  | *****.*:*****:*** **:** * :*. **:                   |     |
| <i>Xoo</i>       | FIPEPTRDVDRPFLMPVEDVFSISGRGTVVTGRIERGIKVGDEIEIVGI   | 250 |
| <i>A. avenae</i> | YIPTPERAVDGAFLMPVEDVFSISGRGTVVTGRVERGIKVGEEIEIVGI   | 250 |
| <i>E. coli</i>   | YIPEPERAIDKPFLPIEDVFSISGRGTVVTGRVERGIKVGEEVEIVGI    | 248 |
|                  | :** * * :* .**:*:*****:*****:*:*****                |     |
