# Supplementary material for: Transgenic Expression of the Dicotyledonous Pattern Recognition Receptor EFR in Rice Leads to Ligand-Dependent Activation of Defense Responses
Source: PubMed Central journal article supplement (PMC4379099; doi:10.1371/journal.ppat.1004809), 2015-03-30
Supplement: ppat.1004809.s009.pdf [file ppat.1004809.s009.pdf]

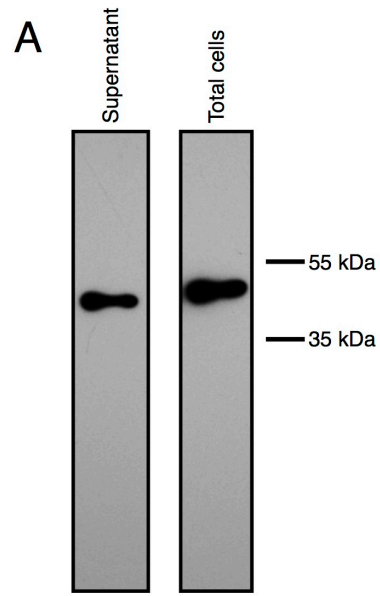

**B**

fid|24121803|locus|VBlXanOry73153\_1278| (100%), 43,080.6 Da  
 Translation elongation factor Tu [Xanthomonas oryzae pv. oryzae PXO99A]  
 9 exclusive unique peptides, 10 exclusive unique spectra, 16 total spectra, 125/396 amino acids (32% coverage)

|                    |                   |                    |                    |                    |
|--------------------|-------------------|--------------------|--------------------|--------------------|
| MAKAKFERTK         | PHVNVGTIGH        | VDHGK <b>TTLTA</b> | <b>ALTK</b> IGAERF | GGEFKAYDAI         |
| DAAPEEKAR <b>G</b> | <b>ITISTAHVEY</b> | <b>ESPSR</b> HYAHV | DCPGHADYVK         | NMITGAAQMD         |
| GAILVCSAAD         | GPMPQTREHI        | LLSRQVGVPH         | IVVFLNKADM         | VDDAELLELV         |
| EMEVRELLSK         | <b>YDFPGDDTPI</b> | <b>IHGSA</b> RLALD | <b>GDQSEIGVPA</b>  | <b>ILKLVDA</b> LDT |
| <b>FIPEPTR</b> DVD | RPFLMPVEDV        | FSISGRGTVV         | TGRIERGIK          | <b>VGDEIEIVGI</b>  |
| <b>RATQKTTVTG</b>  | <b>VEMFRKLLDQ</b> | <b>GQAGD</b> NAGLL | <b>LRGT</b> KRDDVE | RGQVLCCKPGS        |
| IKPHTEFEAE         | VYVLSKDEGG        | RHTPFFKGYR         | PQLYFRTTDI         | TGAIDLPEGV         |
| EMVMPGDNVK         | <b>MTVTLINPVA</b> | <b>MDEGLR</b> FAIR | EGGRTVGAGV         | VSKIIK             |
