# Supplementary material for: Transgenic Expression of the Dicotyledonous Pattern Recognition Receptor EFR in Rice Leads to Ligand-Dependent Activation of Defense Responses
Source: PubMed Central journal article supplement (PMC4379099; doi:10.1371/journal.ppat.1004809), 2015-03-30

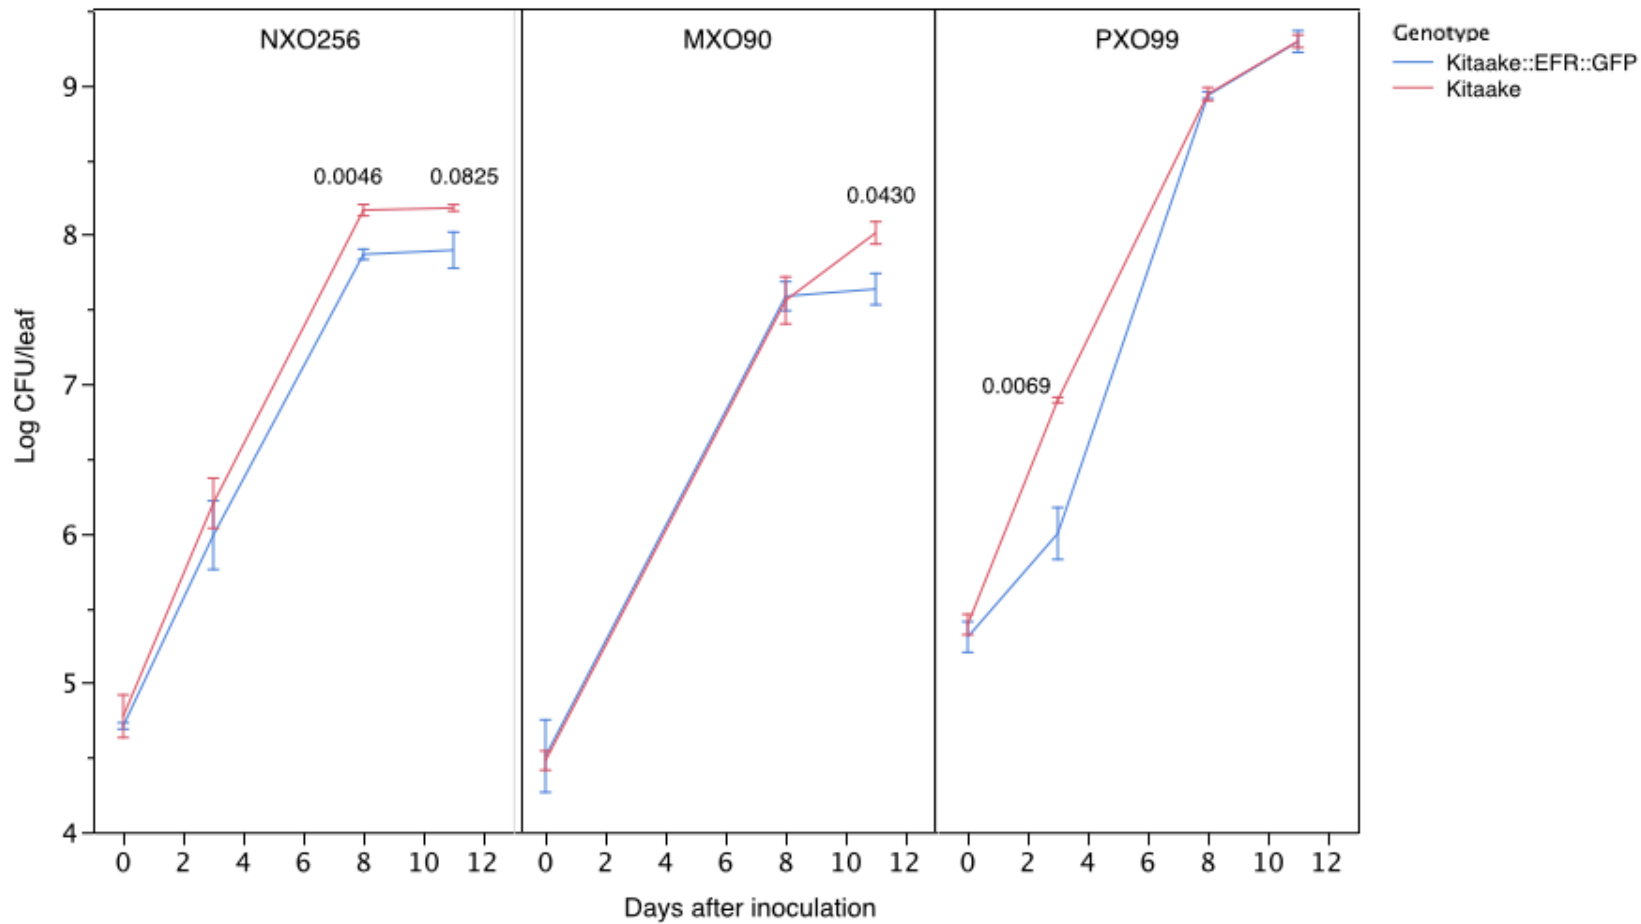

Supplement: ppat.1004809.s013.pdf [file ppat.1004809.s013.pdf]
