# Supplementary material for: Transgenic Expression of the Dicotyledonous Pattern Recognition Receptor EFR in Rice Leads to Ligand-Dependent Activation of Defense Responses
Source: PubMed Central journal article supplement (PMC4379099; doi:10.1371/journal.ppat.1004809), 2015-03-30

**pBD42**

---

**OssERK2**

**XB3**

**XB15**

**XB24**

**empty**

**XA21**

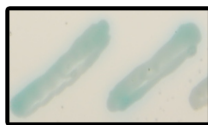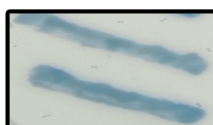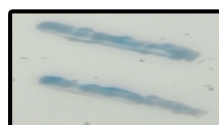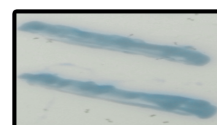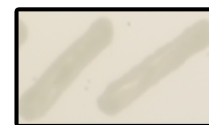

**GUS**

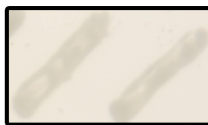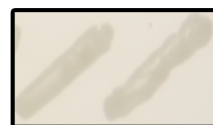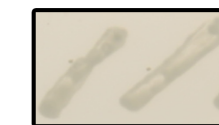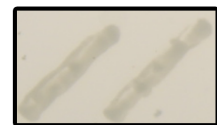

**pLEXA**

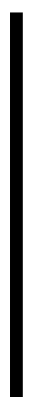

Supplement: ppat.1004809.s014.pdf [file ppat.1004809.s014.pdf]
