# Supplementary material for: Transgenic Expression of the Dicotyledonous Pattern Recognition Receptor EFR in Rice Leads to Ligand-Dependent Activation of Defense Responses
Source: PubMed Central journal article supplement (PMC4379099; doi:10.1371/journal.ppat.1004809), 2015-03-30
Supplement: ppat.1004809.s015.pdf [file ppat.1004809.s015.pdf]

**pLEXA::**

**EFR-ID**

**EFR(D-N)-ID**

**GUS**

**pB42AD::**

**XB15 XB24 OsSERK2 empty**

**XB3 XB24 empty**

**XB15 XB24 OsSERK2 XB3**

**αLexA**

#

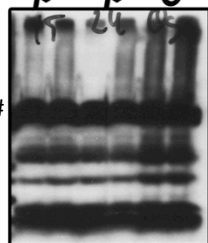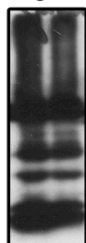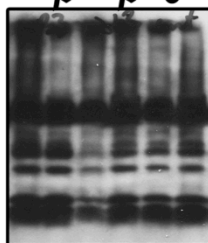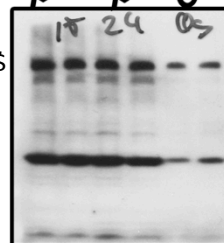

— 130kDa  
— 100kDa  
— 70kDa  
— 50kDa  
— 35kDa

**αHA**

%  
&  
@

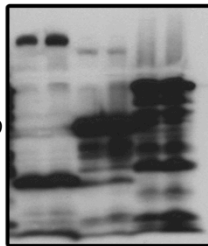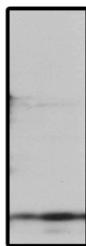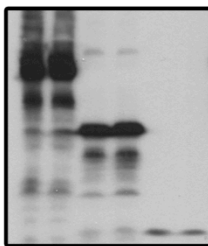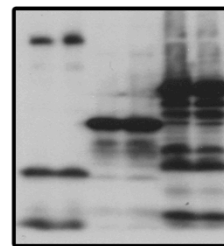

— 130kDa  
— 100kDa  
— 70kDa  
— 50kDa  
— 35kDa
